# Supplementary material
Source: PubMed Central journal article supplement (PMC9106569)
Supplement: 253_2022_11969_MOESM1_ESM.pdf [file 253_2022_11969_MOESM1_ESM.pdf]

Biological activity of Oxadiazole and Thiadiazole Derivatives

Upare Abhay Atmaram, Selvaraj Mohana Roopan\*

Chemistry of Heterocycles & Natural Product Research Laboratory, Department of Chemistry, School of Advanced Sciences, Vellore Institute of Technology, Vellore – 632014, Tamil Nadu, India

\*Corresponding author. E-mail: [mohanaroopan.s@vit.ac.in](mailto:mohanaroopan.s@vit.ac.in); Ph. +91 416 220 2313

Supplementary

Figure

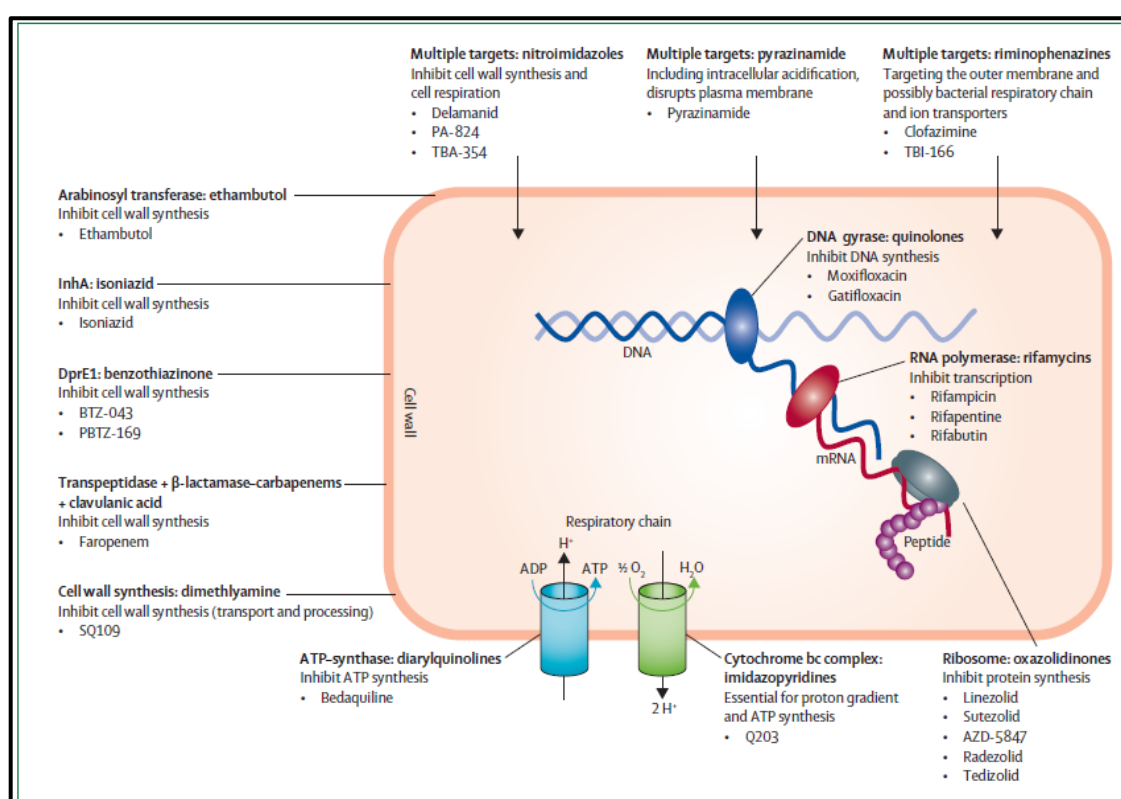

Figure S1 Hallmarks of TB (Reprinted with permission from Ref. (Zumla et al. 2014), copyright 2014 Elsevier)

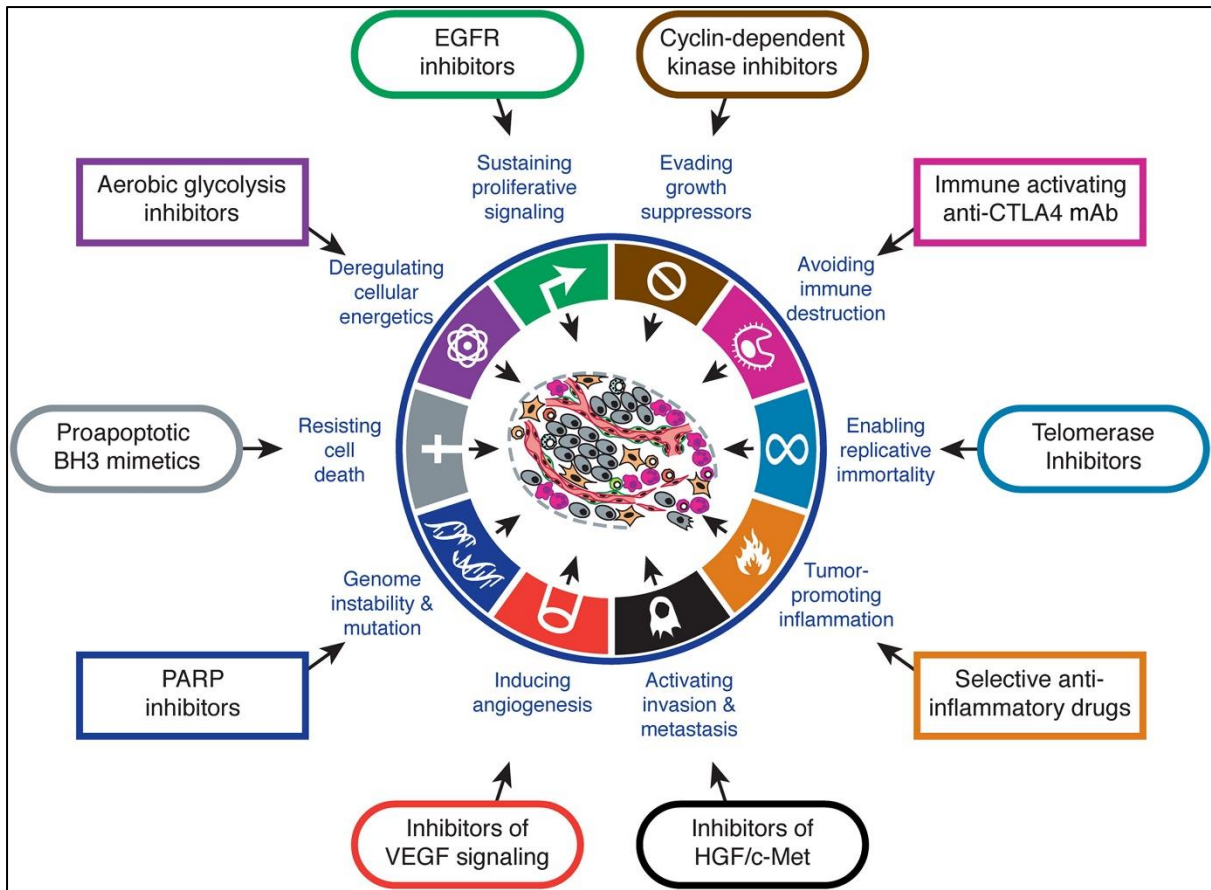

1

2 **Figure S2** Hallmarks of Cancer (Reprinted with permission from Ref. (Hanahan et al. 2011). copyright 2011  
 3 Elsevier)

4

5

6

7

8

9

10

11

12

13

14

15

16

17

18

19

20

21

1 **Tables**

2 **Table S1** The observed activities against this strain of *Mtb*.

|                           | Rifampicin | Isoniazid | Streptomycin | Kanamycin | Moxifloxacin |
|---------------------------|------------|-----------|--------------|-----------|--------------|
| MIC $\mu\text{g.mL}^{-1}$ | 3.81       | 4.17      | 28.58        | 3.24      | 4.01         |

3

4 **Table S2** Experimental observed  $IC_{50}$  values of the most active compounds **12a**, **12b**, **12c**.

| Cell lines   | MCF-7                 | A549 | DU145 | MDAMB 231 |
|--------------|-----------------------|------|-------|-----------|
| Compound no. | $IC_{50} \mu\text{M}$ |      |       |           |
| <b>12a</b>   | 0.12                  | 0.41 | 1.15  | 1.08      |
| <b>12b</b>   | 0.1                   | 0.77 | 0.82  | 1.1       |
| <b>12c</b>   | 0.11                  | 0.23 | 0.92  | 0.43      |
| Etoposide    | 2.11                  | 3.08 | 1.97  | 1.91      |

5

6 **Table S3** The cytotoxic activities recorded by MTT colorimetric assay

| Compound number | $IC_{50}$ in $\mu\text{M}$ |         |       |       |
|-----------------|----------------------------|---------|-------|-------|
|                 | MCF-7                      | HCT-116 | HeLa  | CaCo2 |
| <b>18a</b>      | 0.65                       | 1.93    | 10.56 | 1.06  |
| <b>18b</b>      | 2.41                       | 3.55    | 13.96 | 3.33  |

7

8 **Table S4** Cytotoxic data for compounds

| Cell lines      | A375                    | MCF7 | ACHN |
|-----------------|-------------------------|------|------|
| Compound Number | $IC_{50} (\mu\text{M})$ |      |      |
| <b>20a</b>      | 1.22                    | 0.23 | 0.11 |
| <b>20b</b>      | 2.98                    | 0.7  | 1.89 |
| <b>20c</b>      | 0.37                    | 1.47 | 0.33 |
| Doxorubicin     | 5.51                    | 2.02 | 0.79 |

9

10

11

12

13

14

15

16

17

18

1 **Table S5** Amongst the compounds tested against leukemia cell lines

| Antiproliferative effect on different Leukemia cell line by <b>21a</b> and <b>21b</b> compounds |         |                              |                              |
|-------------------------------------------------------------------------------------------------|---------|------------------------------|------------------------------|
| Cell lines                                                                                      | Subtype | Compound <b>21a</b>          | Compound <b>21b</b>          |
|                                                                                                 |         | <i>IC</i> <sub>50</sub> (μM) | <i>IC</i> <sub>50</sub> (μM) |
| OCL-AML3                                                                                        | AML     | 62                           | 66                           |
| IMS-M2                                                                                          | AML     | 18.4                         | 100                          |
| OCL-AML2                                                                                        | AML     | 37                           | 85                           |
| MV4-11                                                                                          | AML     | 16                           | 38                           |
| Kasumi-1                                                                                        | AML     | 10.3                         | 56                           |
| U937                                                                                            | AML     | 25                           | >100                         |
| NB4                                                                                             | APL     | 12                           | 49                           |
| HL-60                                                                                           | APL     | 30                           | 100                          |
| Karpas 299                                                                                      | ALCL    | 36                           | 25                           |

2

3 **Table S6** *IC*<sub>50</sub> values against various tumor cell lines

| Cell line   | CCRF-CEM                   | HCT-15 | PC 3 | UACC 257 | MCF-10 |
|-------------|----------------------------|--------|------|----------|--------|
| Compound    | <i>IC</i> <sub>50</sub> μM |        |      |          |        |
| <b>33a</b>  | 10.99                      | 9.87   | 4.56 | 12.67    | 461.85 |
| <b>33b</b>  | 9.66                       | 8.59   | 9.92 | 9.2      | 474.44 |
| <b>33c</b>  | 6.99                       | 5.28   | 6.99 | 7.41     | 352.35 |
| Doxorubicin | 6.78                       | 5.17   | 4.67 | 7.34     | 377    |

4
